# Supplementary material for: Assessment of Enterovirus Excretion and Identification of VDPVs in Patients with Primary Immunodeficiency in India: Outcome of ICMR–WHO Collaborative Study Phase-I
Source: MDPI journal article supplement (doi:10.3390/vaccines11071211), 2023-07-06
Supplement: s1 [file s1]

**Table S1.** Enterovirus positive cases among different PID types in the Phase-I study.

| PID Types                            | Total no. of cases | Total no. of cases positive for Enterovirus |
|--------------------------------------|--------------------|---------------------------------------------|
| CVID                                 | 20                 | 6                                           |
| Agammaglobulinemia                   | 16                 | 0                                           |
| XLA                                  | 16                 | 2 (1 P3SL)                                  |
| Hypogammaglobulinemia                | 9                  | 1                                           |
| TRNT1 deficiency                     | 2                  | 2                                           |
| IgA deficiency                       | 1                  | 0                                           |
| PIK3CD                               | 1                  | 0                                           |
| SCID                                 | 14                 | 2 (1 P1SL)                                  |
| WAS                                  | 12                 | 5 (1 P3SL)                                  |
| Hyper IgM syndrome                   | 9                  | 4 (1 iVDPV)                                 |
| Dock 8 deficiency                    | 6                  | 1                                           |
| AT with IgA deficiency               | 2                  | 2                                           |
| Ataxia Telangiectasia                | 2                  | 2                                           |
| CARD11 LOF                           | 1                  | 0                                           |
| MHC Class II deficiency              | 1                  | 0                                           |
| ICF syndrome                         | 2                  | 1                                           |
| CMC-STAT1 GOF                        | 7                  | 1                                           |
| Leucocyte adhesion defect (LADI/III) | 5                  | 0                                           |
| Chronic Granulomatous Disease (CGD)  | 3                  | 0                                           |
| HLH                                  | 3                  | 0                                           |
| MSMD                                 | 3                  | 1                                           |
| ALPS                                 | 2                  | 0                                           |
| Auto Inflammatory disease            | 2                  | 1                                           |
| SPENCDI                              | 2                  | 1                                           |
| CARMIL-2                             | 1                  | 0                                           |
| CD55 deficiency                      | 1                  | 0                                           |
| Chediak Higashi Syndrome             | 1                  | 1                                           |
| Complement defects                   | 1                  | 0                                           |
| Congenital Neutropenia               | 1                  | 0                                           |
| Griscelli                            | 1                  | 0                                           |
| H Syndrome                           | 1                  | 0                                           |
| Hyper IgD                            | 1                  | 0                                           |
| IPEX                                 | 1                  | 0                                           |
| LRBA                                 | 1                  | 0                                           |
| XMEN                                 | 1                  | 0                                           |
| XLP2                                 | 1                  | 0                                           |
| Undefined                            | 1                  | 0                                           |
| <b>TOTAL</b>                         | <b>154</b>         | <b>33</b>                                   |

**Table S2 A:** Enterovirus positive cases in patients with Predominantly Antibody Deficiency (PAD) in the Phase I study.

| PID types in PAD      | Total no. of cases | EV positive cases |
|-----------------------|--------------------|-------------------|
| CVID                  | 20                 | 6                 |
| Agammaglobulinemia    | 16                 | 0                 |
| XLA                   | 16                 | 2<br>(1 P3SL)     |
| Hypogammaglobulinemia | 9                  | 1                 |
| TRNT1 deficiency      | 2                  | 2                 |
| IgA deficiency        | 1                  | 0                 |
| PIK3CD                | 1                  | 0                 |
| <b>TOTAL</b>          | <b>65</b>          | <b>11</b>         |

**Table S2 B:** Enterovirus positive cases in patients with Combined Immuno-Deficiency during the Phase-I study.

| PID types in CID        | Total no. of cases | EV positive cases |
|-------------------------|--------------------|-------------------|
| SCID                    | 14                 | 1 (1 P1SL)        |
| WAS                     | 12                 | 5 (1 P3SL)        |
| Hyper IgM syndrome      | 9                  | 4 (1 iVDPV1)      |
| Dock 8 deficiency       | 6                  | 1                 |
| AT with IgA deficiency  | 2                  | 1                 |
| Ataxia Telangiectasia   | 2                  | 2                 |
| CARD11 LOF              | 1                  | 0                 |
| MHC Class II deficiency | 1                  | 0                 |
| ICF syndrome            | 2                  | 1                 |
| <b>TOTAL</b>            | <b>49</b>          | <b>15</b>         |

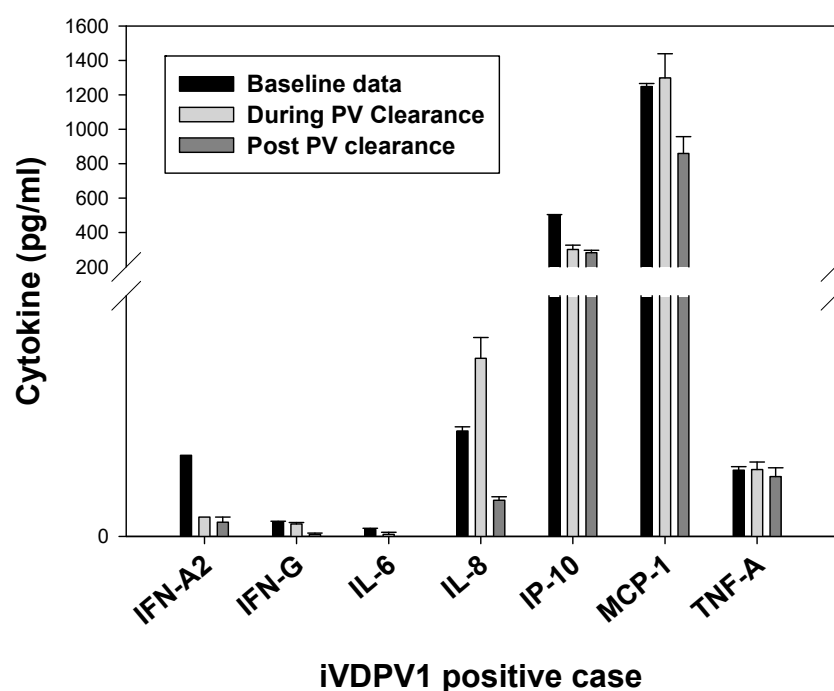

**Figure S1.** Estimation of cytokine secretion in serum sample of iVDPV case by multiplex ELISA: IL8 was found to be significantly high during the viral clearance as compared to the base line and post clearance period.
